# Supplementary material
Source: PubMed Central journal article supplement (PMC3285333)

Table S1. Primer sequences used in this study

|                         | Forward primer (5'-3')    | Reverse primer (5'-3')    | Size<br>(bp) |
|-------------------------|---------------------------|---------------------------|--------------|
| 18S rRNA                | CAGCCACCCGAGATTGAGCA      | TAGTAGCGACGGGCGGTGTG      | 252          |
| human DOT1L             | CCAACACGAGTGTTATATTTGTGAA | TGAGTTTTGGGTTTTTCAGACTAGA | 306          |
| Rat DOT1L               | GTCCTGTGTGCCACCAGATG      | AGACAGCTTCTCCAGCCGAG      | 313          |
| Cyclin D1               | GCGCAGACCTTCGTTGCCCT      | GCGCAGGCTTGACTCCAGCA      | 237          |
| Cyclin E1               | TGGCCAAAATCGACAGGACGGC    | TGGCTGCAGAAGAGGGTGTTC     | 290          |
| Cyclin A2               | TCGGCGCTGCTAGCATTGCA      | AAGCCAGGGCATCTTCACGCT     | 337          |
| Cyclin B1               | CAACATGGCAGGCGCAAAGC      | TGGCACTGGCACCAGCATAGG     | 223          |
| p15 <sup>INK4B</sup>    | TGCGCGAGGAGAACAAGGGCAT    | TGTGCGCAGGTACCCTGCAA      | 401          |
| p18 <sup>INK4C</sup>    | TTGGGGGAACGAGTTGGCGT      | AGCCCCGTTTGCCTGCATCA      | 472          |
| p19 <sup>INK4D</sup>    | ACGGCGCTGCAGGTCATGAT      | ACCATGTGGCCCTGCAGGAT      | 359          |
| p21 <sup>CIP/WAF1</sup> | AGTGGACAGCGAGCAGCTG       | AGCCGGCGTTTGGAGTGGTAG     | 399          |
| p27 <sup>KIP1</sup>     | CGTGCGAGTGTCTAACGGGA      | TTCCTGCGCATTGCTCCGCT      | 443          |
| p57 <sup>KIP2</sup>     | AACGGCGCGGCGATCAAGAA      | CTCTTGC GCGGGGTCTGCTC     | 164          |

FIGURE S1. DOT1 deficiency upregulates p21 expression. A549 cells were transfected with control or DOT1L siRNA-b or c. The levels of p21 were measured by RT-PCR.

FIGURE S2. The mRNA levels of DOT1L and GAPDH were measured by RT-PCR in lung tissues of young and old SD rats. The relative levels of DOT1L mRNA are shown as a scatter plot in a right panel. Means for each group are shown as a bar.

FIGURE S3. The mRNA levels of DOT1L and 18S were measured by RT-PCR in normal (N) and tumor (T) tissues of lung cancer patients. The relative levels of DOT1L mRNA are shown as a scatter plot in a right panel. Means for each group are shown as a bar.

**Figure S1**

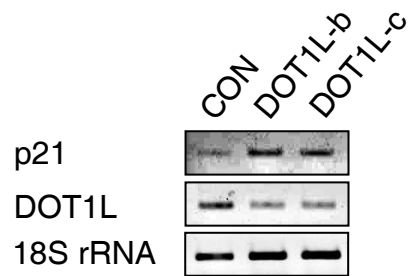

**Figure S2**

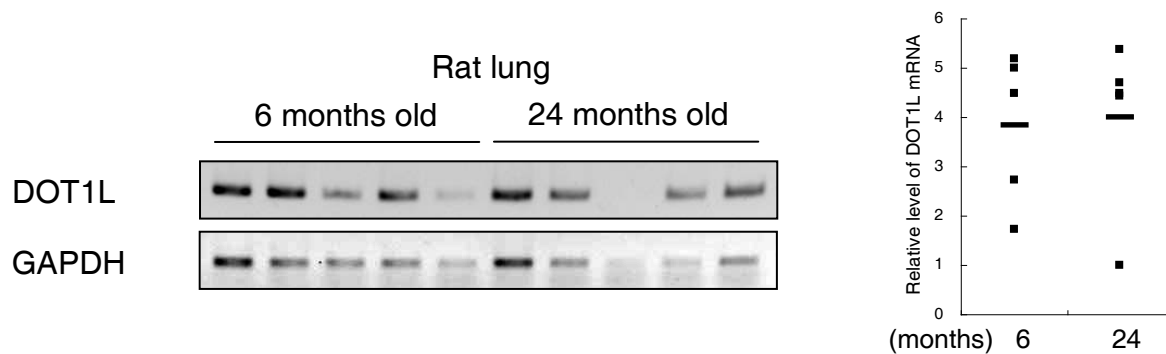

**Figure S3**

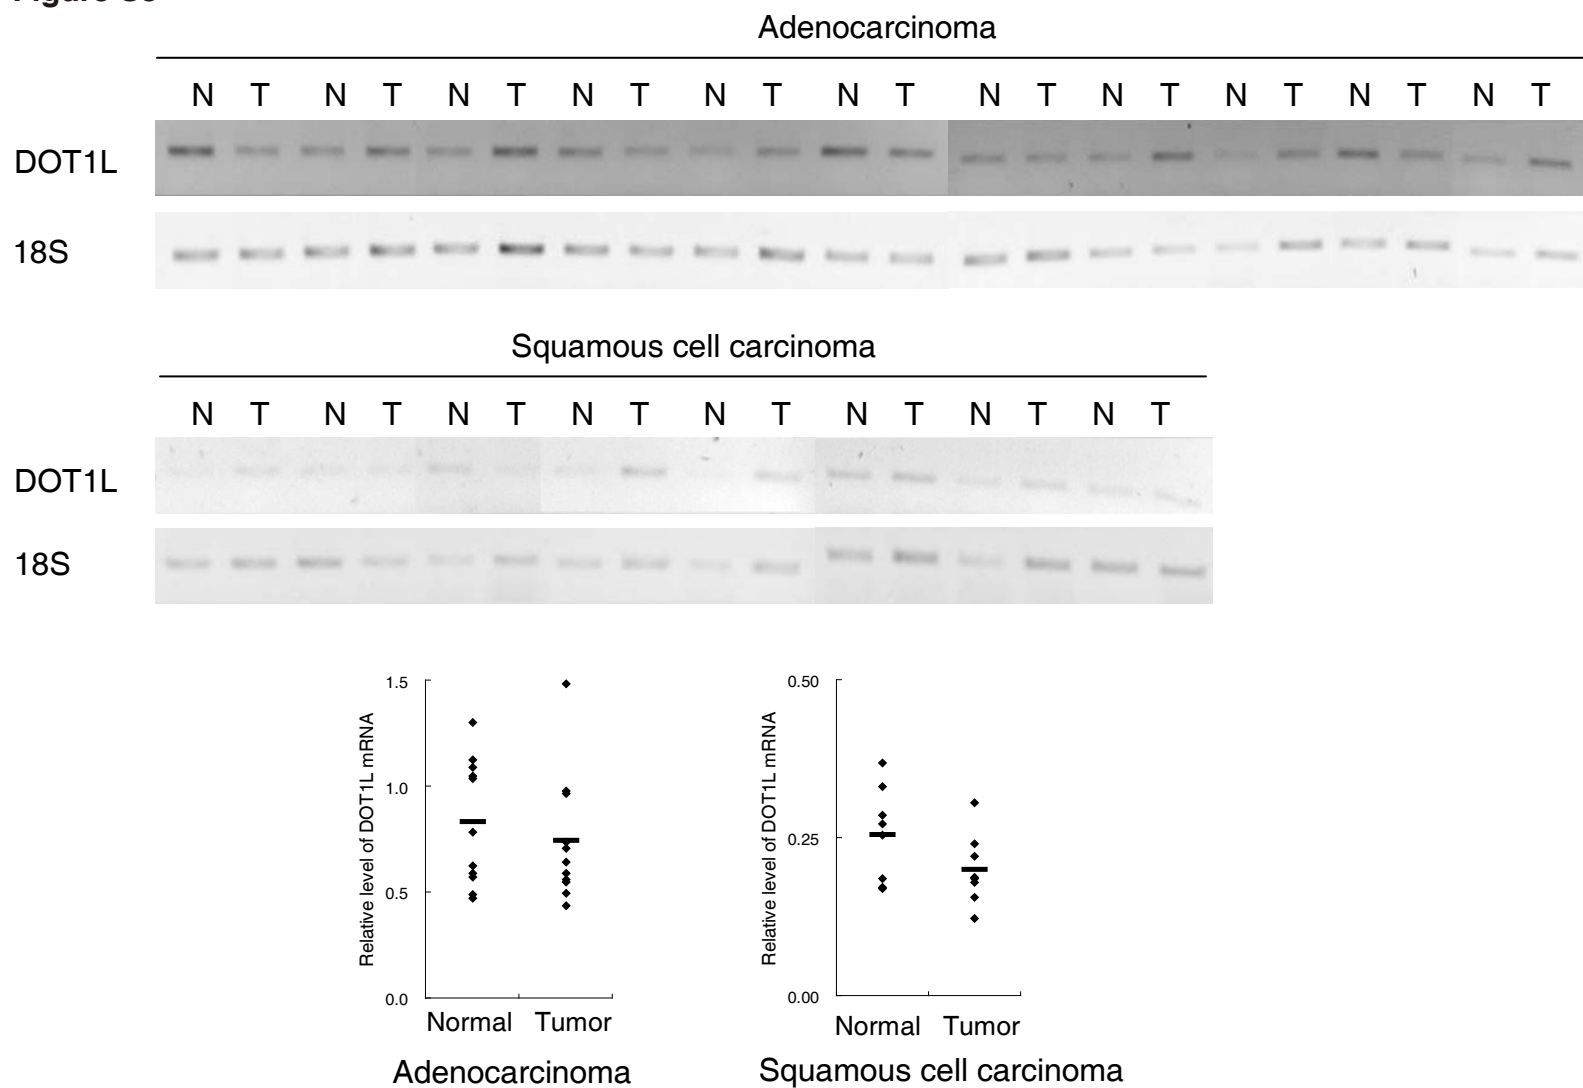

Supplement: supp_M111.328138_jbc.M111.328138-1.pdf [file supp_M111.328138_jbc.M111.328138-1.pdf]
